# Supplementary material
Source: PubMed Central journal article supplement (PMC6682008)
Supplement: ao9b01228_si_001.pdf [file ao9b01228_si_001.pdf]

## ***Supporting Information***

### **Repurposing of tranilast for potential neuropathic pain treatment by inhibition of sepiapterin reductase in the BH<sub>4</sub> pathway**

Benjamin J.R. Moore,<sup>1,2</sup> Barira Islam,<sup>1,2</sup> Sean Ward,<sup>3</sup> Olivia Jackson,<sup>3</sup> Rebecca Armitage,<sup>3</sup> Jack Blackburn,<sup>4</sup> Shozeb Haider<sup>5</sup> and Patrick C. McHugh<sup>1,2\*</sup>

<sup>1</sup> Centre for Biomarker Research, School of Applied Sciences, University of Huddersfield, Queensgate, Huddersfield, HD1 3DH, UK

<sup>2</sup> Department of Pharmacy, School of Applied Sciences, University of Huddersfield, Queensgate, Huddersfield, HD1 3DH, UK

<sup>3</sup> Innovative Physical Organic Solutions (IPOS), Department of Chemical and Biological Sciences, University of Huddersfield, Queensgate, Huddersfield, HD1 3DH, UK

<sup>4</sup> Department of Chemical Sciences, School of Applied Sciences, University of Huddersfield, Queensgate, Huddersfield, HD1 3DH, UK

<sup>5</sup> UCL School of Pharmacy, 29-39 Brunswick Square, London WC1N 1AX, UK

\*To whom the correspondence should be addressed

## SUPPORTING TABLES

**Table S1.** Compounds selected from docking of the LOPAC<sup>1280</sup> library that showed docking scores below -35. The IC<sub>50</sub> concentrations calculated from *in vitro* SPR protein assays are included, along with their hydrogen bonds formed with the four key binding residues in the starting SPR-sepiapterin complex. The green boxes indicate the presence of a hydrogen bond (bond strength > 1 kcal/mol calculated in Molsoft). The grey boxes indicate no hydrogen bond of the hSPR residue with the drug.

| Compound Name                         | IC <sub>50</sub> (μM) | Interactions With Sepiapterin Binding Residues |      |      |      |       |
|---------------------------------------|-----------------------|------------------------------------------------|------|------|------|-------|
|                                       |                       | S157                                           | Y170 | G199 | D257 | Other |
| Tranilast                             | 5.889                 |                                                |      |      |      |       |
| Nordihydroguaiaretic acid             | 8.262                 |                                                |      |      |      |       |
| N-Acetylserotonin                     | 11.61                 |                                                |      |      |      |       |
| Aurintricarboxylic Acid               | 33.19                 |                                                |      |      |      |       |
| 6-Chloromelatonin                     | 37.3                  |                                                |      |      |      |       |
| Emodin                                | 62.03                 |                                                |      |      |      |       |
| N-(4-amino-2-chlorophenyl)phthalimide | 63.46                 |                                                |      |      |      |       |
| Tyrphostin AG537                      | 94.63                 |                                                |      |      |      |       |
| Hispidin                              | 106.2                 |                                                |      |      |      |       |
| BIO                                   | 117.9                 |                                                |      |      |      |       |
| Genistein                             | 137.2                 |                                                |      |      |      |       |
| L-732138                              | 148.8                 |                                                |      |      |      |       |
| Tyrphostin AG494                      | 204.3                 |                                                |      |      |      |       |
| Quercetin Dihydrate                   | 234.7                 |                                                |      |      |      |       |
| N-Acetyltryptamine                    | 246.5                 |                                                |      |      |      |       |
| Nocodazole                            | 264.5                 |                                                |      |      |      |       |
| Supercinnamaldehyde                   | 362.2                 |                                                |      |      |      |       |
| Niclosamide                           | 620.7                 |                                                |      |      |      |       |
| 5,6,7,8-Tetrahydro-L-biopterin        | No Inhibition         |                                                |      |      |      |       |
| AS-252424                             | No Inhibition         |                                                |      |      |      |       |
| Benserazide                           | No Inhibition         |                                                |      |      |      |       |
| Benzamil                              | No Inhibition         |                                                |      |      |      |       |
| CP-91149                              | No Inhibition         |                                                |      |      |      |       |
| Formoterol                            | No Inhibition         |                                                |      |      |      |       |
| Ofloxacin                             | No Inhibition         |                                                |      |      |      |       |
| Prazosin                              | No Inhibition         |                                                |      |      |      |       |
| S(+)- Raclopride L-tartrate           | No Inhibition         |                                                |      |      |      |       |

**Table S2.** List of antibodies used for western blot studies.

| <b>Antibody</b> | <b>Species</b>          | <b>Dilution</b> | <b>Supplier</b>       | <b>Reference</b> |
|-----------------|-------------------------|-----------------|-----------------------|------------------|
| GCH1            | <i>Hs</i>               | 1:500           | SantaCruz Biotech     | sc-134574        |
| SPR             | <i>Hs</i>               | 1:1000          | Abcam                 | ab157194         |
| STAT3           | <i>Hs</i>               | 1:1000          | ProSci Inc            | 7197             |
| GAPDH           | <i>Hs</i>               | 1:2000          | Abcam                 | ab8245           |
| AlexaFluor 647  | <i>Goat anti-mouse</i>  | 1:2000          | ThermoFisher LifeTech | A21236           |
| AlexaFluor 546  | <i>Goat anti-rabbit</i> | 1:2000          | ThermoFisher LifeTech | A11010           |

**Table S3.** List of primer pairs used for qRT-PCR.

| Gene           | Species   | Primer Sequence           | Tm(°C) |
|----------------|-----------|---------------------------|--------|
| <i>β-Actin</i> | <i>Hs</i> | F: CTTCCAGCCTTCCTTCCTG    | 60     |
|                |           | R: CTCCTGCTTGCTGATCCAC    | 60     |
| <i>GAPDH</i>   | <i>Hs</i> | F: GGTATGGACTGTGGTACTGAG  | 61.8   |
|                |           | R: TGCACCACCAACTGCTTAGC   | 59.4   |
| <i>GCH1</i>    | <i>Hs</i> | F: ACAAACAAAACCGCAACTCC   | 60     |
|                |           | R: TGGGATGAATTTGAAGAGCA   | 59     |
| <i>GCHFR</i>   | <i>Hs</i> | F: TCTGCCTTGCTCCTCTCTTC   | 60     |
|                |           | R: CCCTCTCCCACTGCTTGAC    | 61     |
| <i>CTBP1</i>   | <i>Hs</i> | F: TGTAAGTCTGGACCCAAGG    | 59.4   |
|                |           | R: TACACGCCTCTGTCATTCGT   | 59.4   |
| <i>GSK3β</i>   | <i>Hs</i> | F: CTGTGTGTTGGCTGAGCTGT   | 59.4   |
|                |           | R: TTTGCTCCCTTGTTGGAGTT   | 55.3   |
| <i>iNOS</i>    | <i>Hs</i> | F: CCATAAGGCCAAAGGGATTT   | 55.3   |
|                |           | R: ATCTGGAGGGGTAGGCTTGT   | 59.4   |
| <i>SPR</i>     | <i>Hs</i> | F: GGCTCTCTTGGGGATGTGT    | 60     |
|                |           | R: TTCAGGACGCTGGAAGTCA    | 60     |
| <i>STAT1</i>   | <i>Hs</i> | F: TCAGTCTTTTCCAGCAGCTCA  | 57.9   |
|                |           | R: CTTCAAGACCAGCGGCCTC    | 61     |
| <i>STAT3</i>   | <i>Hs</i> | F: GGGAGAGATTGACCAGCAGTAT | 60.3   |
|                |           | R: TGGCTTCTCAAGATACCTGCTC | 60.3   |
| <i>NFKB1</i>   | <i>Hs</i> | F: GAGCAGGCATCCATCGAGAT   | 59.4   |
|                |           | R: GGCTGTCAGATGGTCCTTGT   | 57.3   |
| <i>SPHK1</i>   | <i>Hs</i> | F: ATGCTGGCTATGAGCAGGTC   | 59.4   |
|                |           | R: GTGCAGAGACAGCAGGTTCA   | 59.4   |

## SUPPORTING FIGURES

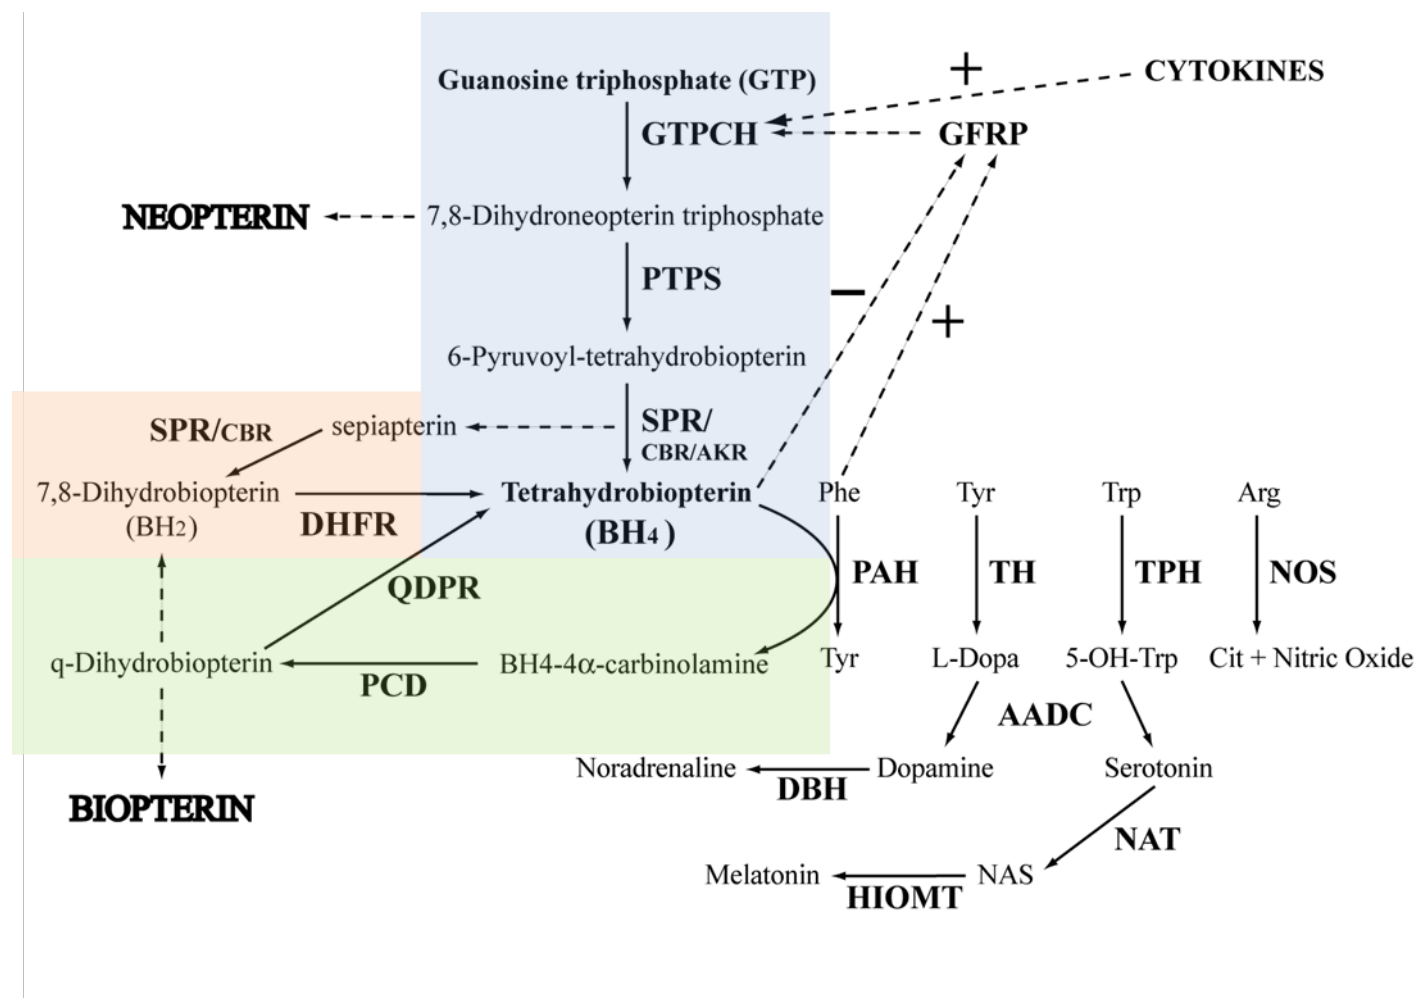

**Figure S1.** The tetrahydrobiopterin biosynthesis pathways in the body. The *de novo*, salvage and biopterin recycling pathways are shown in blue, orange and green, respectively. The biosynthesis of BH<sub>4</sub> starts *de novo* from guanosine triphosphate (GTP), through reactions catalyzed by the enzymes GTP cyclohydrolase I (GTPCH/GCH1), 6-pyruvoyltetrahydropterin synthase (PTPS) and sepiapterin reductase (SPR). Alternatively, the final two-step reduction of the intermediate 6-pyruvoyl-tetrahydrobiopterin (PPS) to BH<sub>4</sub> can be effected by aldose reductase (AKR) and carbonyl reductase (CBR). The product of both these reactions is sepiapterin, which can be salvaged into BH<sub>4</sub> through SPR, CBR and dihydrofolate reductase (DHFR). Two additional enzymes, pterin-4 $\alpha$ -carbinolamine dehydratase (PCD) and dihydropteridine reductase (QDPR) are involved in the regeneration of BH<sub>4</sub> from intermediates formed during the hydroxylation of aromatic amino acids. GCH1 activity is modulated by the interaction of GTP cyclohydrolase feedback regulator (GFRP) and effector molecules, BH<sub>4</sub> and phenylalanine. Phe, phenylalanine; Tyr, tyrosine; Trp, tryptophan; Arg, arginine; Cit, citrulline; PAH, phenylalanine hydroxylase; TH, tyrosine hydroxylase; TPH, tryptophan hydroxylase; NOS, nitric oxide synthase; 5-OH-Trp, 5-hydroxytryptophan; AADC, aromatic amino-acid decarboxylase; DBH, dopamine  $\beta$ -hydroxylase; NAT, N-acetyltransferase; NAS, N-acetylserotonin; HIOMT, hydroxyindole-O-methyltransferase (Figure amended from Reference<sup>33</sup> in the main text).

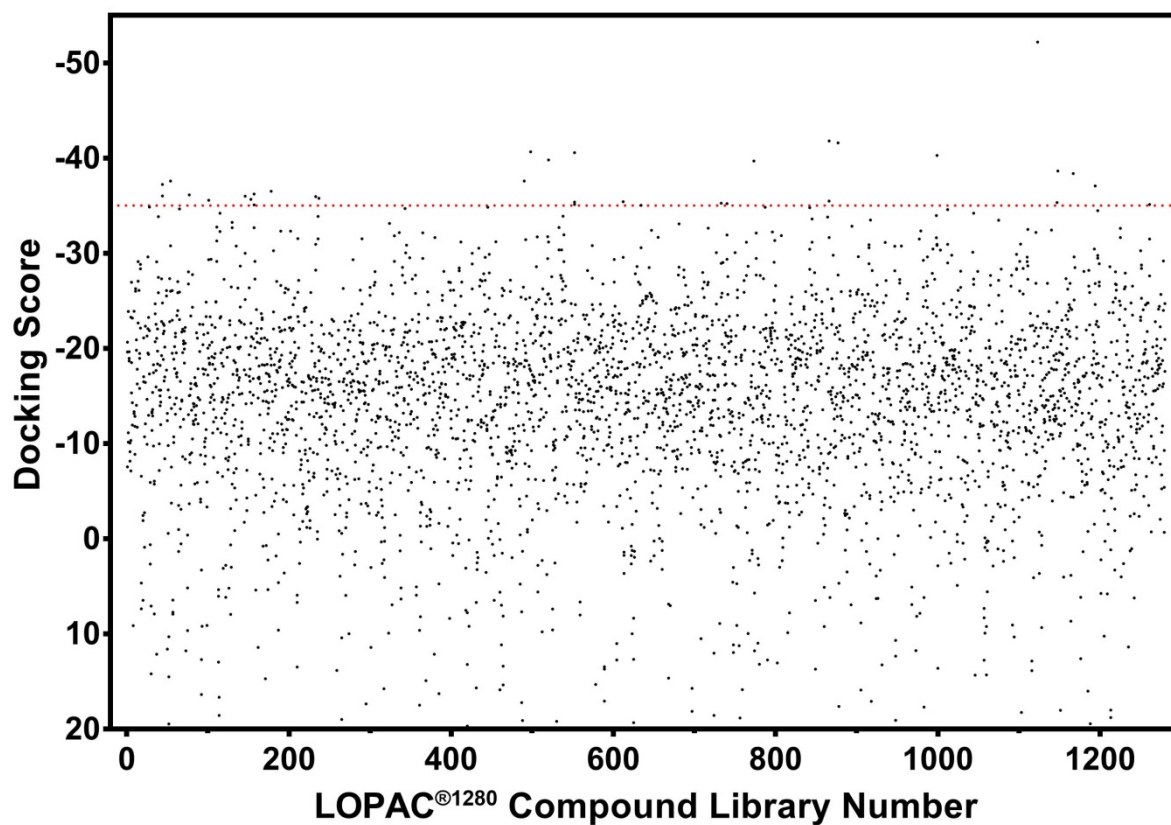

**Figure S2.** The scores of LOPAC<sup>1280</sup> compounds on hSPR obtained by using the docking tool of Molsoft ICM. The sepiapterin showed the lowest score of -52.09 (compound number 1123). Only docking scores of 20 and below are shown in the figure. The cut-off of -35 is shown as a red dashed line.

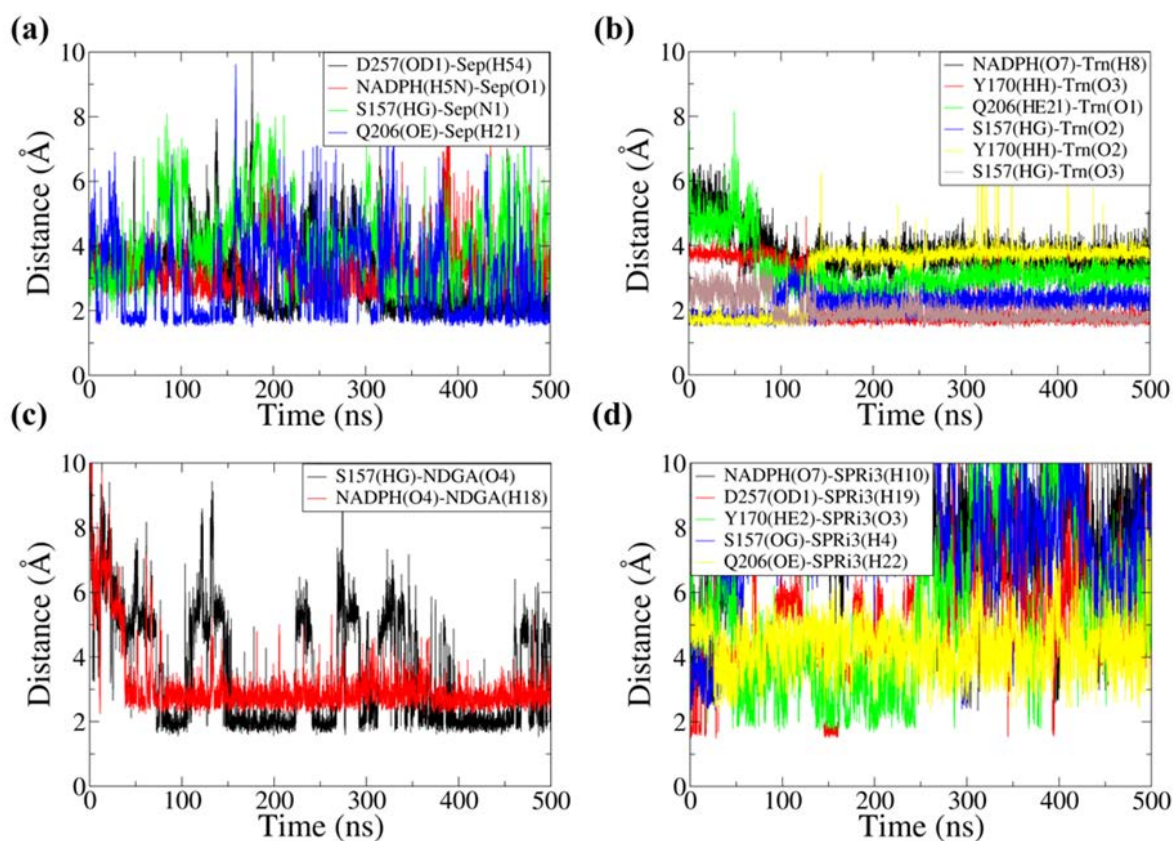

**Figure S3.** Stability of the hydrogen bonds in the hSPR-drug simulations. The interactions of (a) hSPR-sepiapterin, (b) hSPR-tranilast, (c) hSPR-NDGA and (d) hSPR-SPRi3 are shown in the figure. The aromatic ring of NADPH sampled stacking interactions with aromatic rings of sepiapterin, tranilast and NDGA for some part of the simulations. No stable hydrogen bond was sampled by SPR-SPRi3 complex. A cut-off of 3.5 Å and bond angle of 20° was used for hydrogen bond formation.

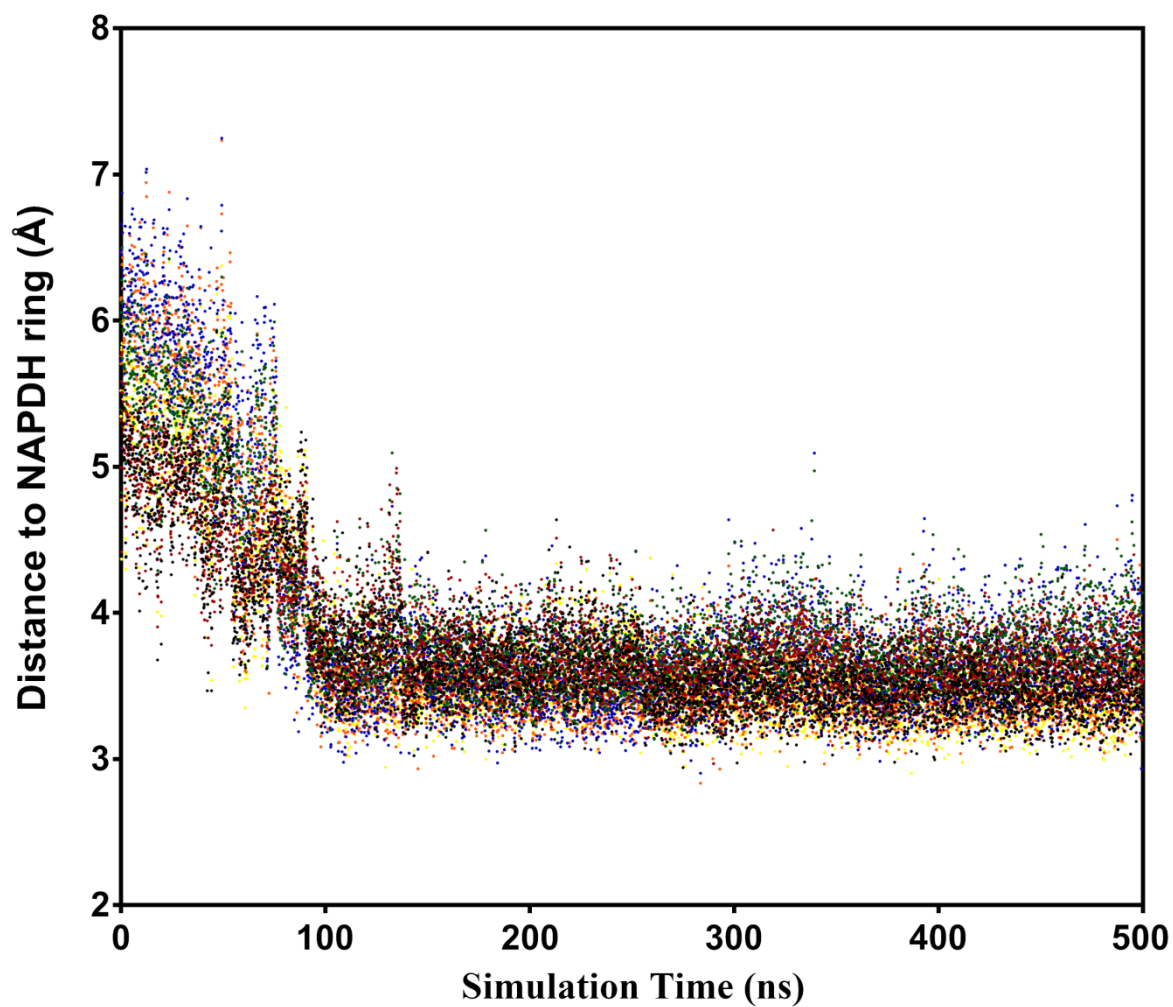

**Figure S4.** Distance between the atoms of the tranilast and NADPH rings to visualise stacking interactions in the 500 ns simulation. The distances between the tranilast-NADPH aromatic ring atoms C3-C5N (black), C4-C6N (red), C6-N1N (green), C7-C2N (blue), C8-C3N (orange) and C9-C4N (yellow) are shown as colored dots.

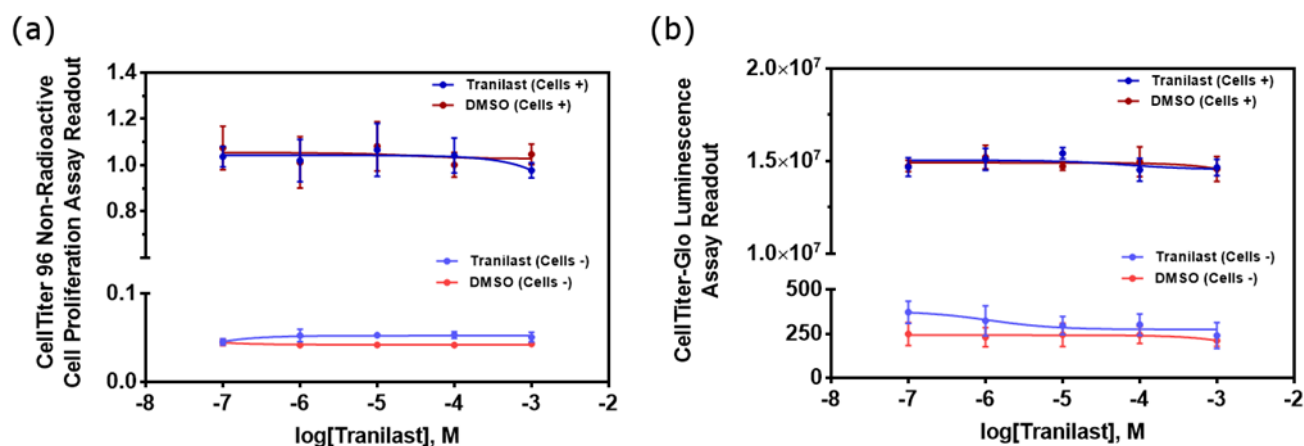

**Figure S5.** Effect of tranilast on cell viability and metabolism. a) The 570 nm absorbance readout in SH-SY5Y cells of coloured formazan product after treatment with a dose range of tranilast, quantified using the CellTiter® 96 Non-Radioactive Cell Proliferation Assay. b) Luminescence readout of SH-SY5Y intracellular ATP after treatment with a dose range of tranilast, quantified using the CellTiter-Glo® Luminescent Cell Viability Assay. All data is presented as mean  $\pm$  SEM, n=3 for each assay point, including assay controls (DMSO and cell free wells).

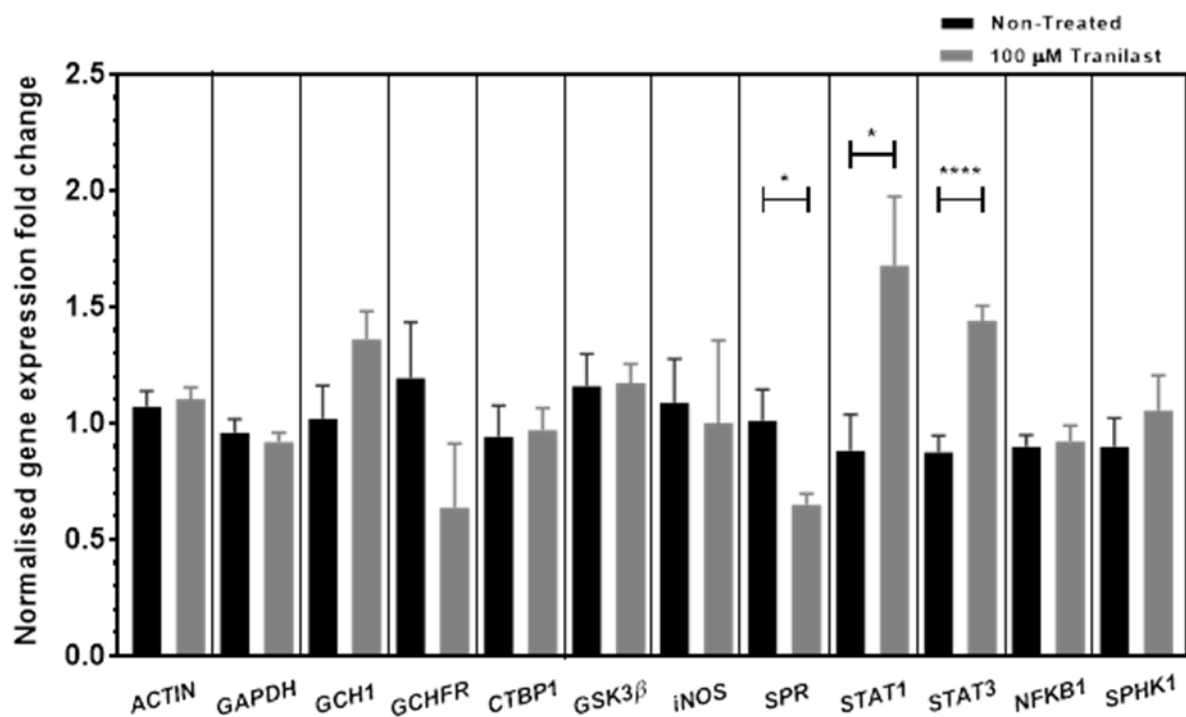

**Figure S6.** Expression changes measured by qRT-PCR of various genes of interest in the BH<sub>4</sub> pathway in RNA extracted from SH-SY5Y cells after 24 hour treatment with 100  $\mu$ M tranilast. Data was normalised vs ACTIN and GAPDH. Results are presented as mean  $\pm$  SEM (n=3). One-way ANOVA with Tukey's post-hoc test was performed (\* =  $p \leq 0.05$ , \*\*\*\* =  $p \leq 0.0001$ ).

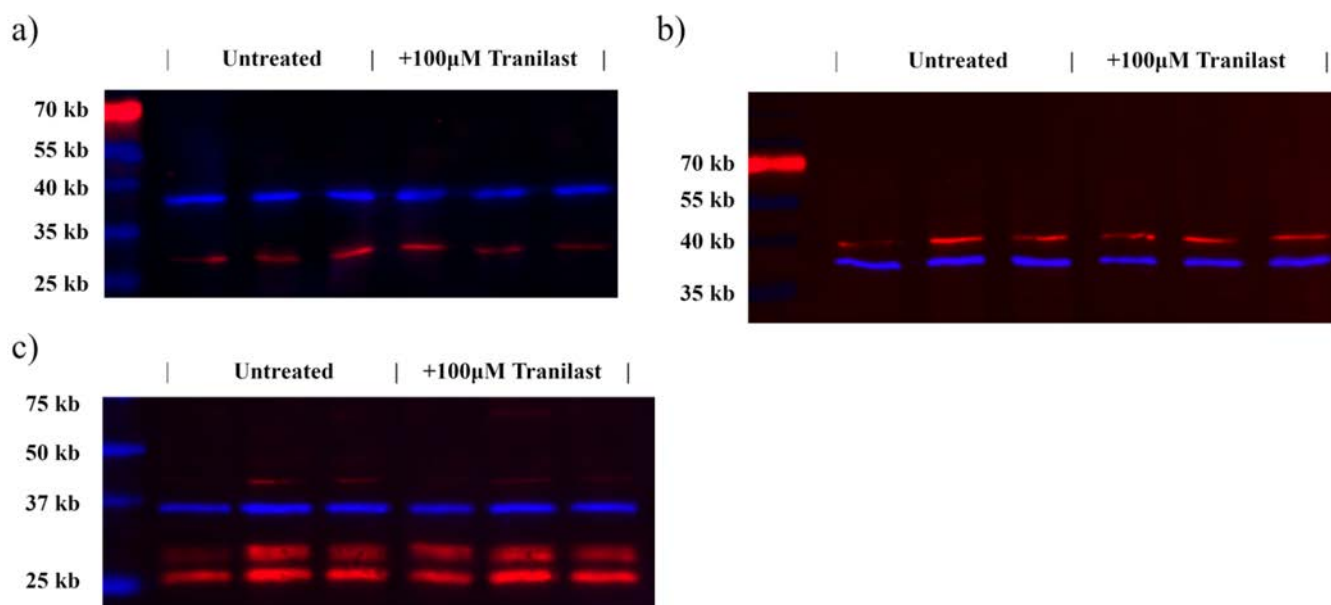

**Figure S7.** Western blot images of (a) SPR, (b) STAT3 and (c) GCH1. Three replicates of untreated and 100 μM tranilast treated protein extracts are shown in each gel. GAPDH (37 kb, blue band) was used as the loading control.

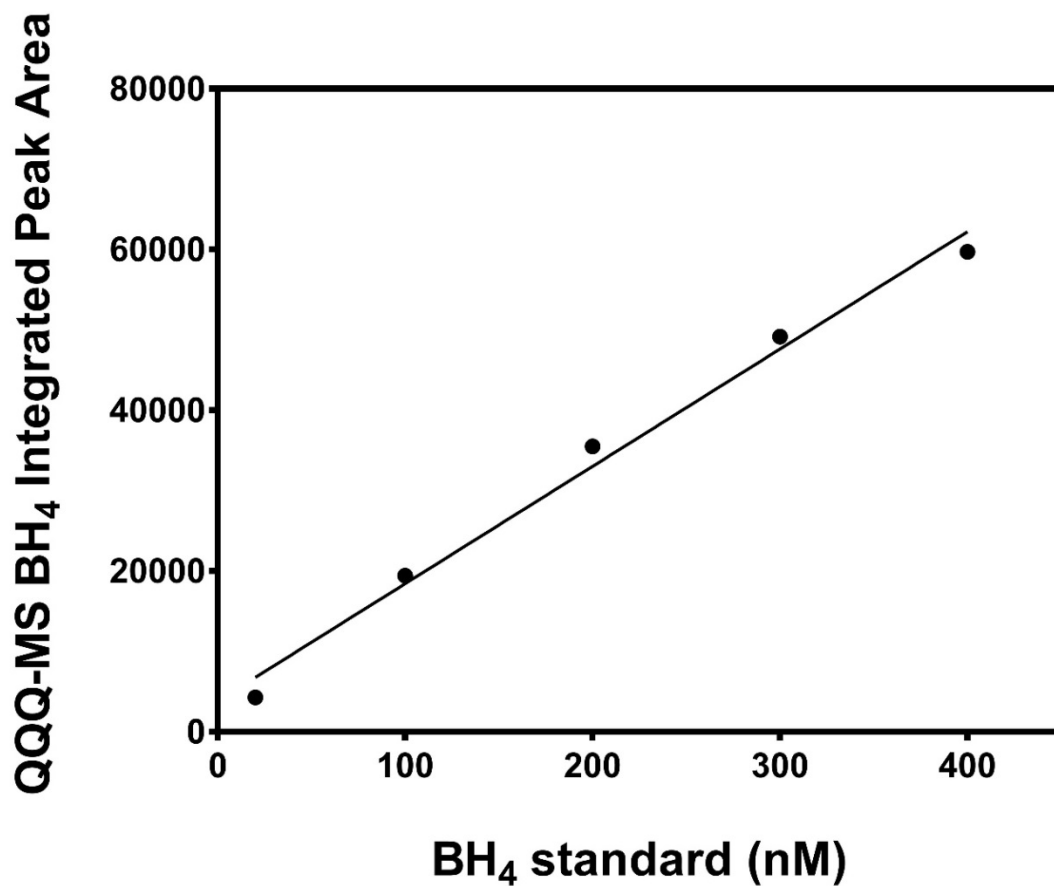

**Figure S8.** QQQ-MS quantification of the BH<sub>4</sub> standard for determining the limit of detection of the instrument and system parameters. The  $R^2$  value for the linear regression curve was 0.989.
